# Supplementary material for: Total synthesis of (±) commiphoranes C–D and their epimers
Source: Royal Society of Chemistry journal article supplement (doi:10.1039/d2ob00158f), 2022-01-01
Supplement: d2ob00158f1.pdf [file d2ob00158f1.pdf]

## Supporting Information

### Total Synthesis of ( $\pm$ ) Commiphoranes C-D and their Epimers

Xiaoyu Liu,<sup>a</sup> Haidong Deng,<sup>b</sup> Yingjun Jiang,<sup>a</sup> Yang Cao,<sup>a</sup> Zhe Wang,<sup>a</sup> Xiaozhen Jiao,<sup>\*a</sup> and Ping Xie<sup>a</sup>

<sup>a</sup> State Key Laboratory of Bioactive Substance and Function of Natural Medicine, Beijing Key Laboratory of Active Substance Discovery and Druggability Evaluation, Institute of Materia Medica, Chinese Academy of Medical Sciences and Peking Union Medical College, Beijing 100050, China.

<sup>b</sup> Beijing Key Laboratory of New Drug Mechanisms and Pharmacological Evaluation Study, Department of Pharmacology, Institute of Materia Medica, Chinese Academy of Medical Sciences and Peking Union Medical College, Beijing, 100050, China.

\* Corresponding author

Prof. Xiaozhen Jiao, email: jiaoxz@imm.ac.cn

### Contents

|                                                                                                                                              |        |
|----------------------------------------------------------------------------------------------------------------------------------------------|--------|
| 1. General Information.....                                                                                                                  | S2     |
| 2. <sup>1</sup> H, <sup>13</sup> C, NOE and 2D-NMR Spectral Copies.....                                                                      | S3-S21 |
| 3. The comparison of <sup>1</sup> H and <sup>13</sup> C NMR data of compound <b>1a</b> and reported natural commiphorane C.....              | S22    |
| 4. The comparison of <sup>1</sup> H and <sup>13</sup> C NMR data of compound <b>1b</b> and reported natural commiphorane D.....              | S23    |
| 5. Compounds <b>1a-1d</b> and ( $\pm$ ) <b>11</b> inhibited the fibrogenic action of TGF- $\beta$ 1 in rat renal proximal tubular cells..... | S24    |

## 1. General Information

<sup>1</sup>H NMR and <sup>13</sup>C NMR were recorded on Mercury 400, Bruker AV500, AV600, JEOL ECZ400S spectrometer. Coupling constants are given in Hz and chemical shifts are expressed as  $\delta$  values in ppm. The following multiplicity abbreviations are used: (s) singlet, (d) doublet, (t) triplet, (q) quartet, (m) multiplet. ESI-HRMS data were measured on Thermo Exactive Orbitrap plus spectrometer. All the chemicals were purchased from commercial sources: Sigma-Aldrich Chemical Co., Arcos Chemical Co., and J&K Chemical Co. with the purity of more than 95%. Solvents were dried according to standard procedures when needed. Flash column chromatography was performed on Biotage Isolera one or carried out on silica gel (200–300 mesh). IR spectra were recorded on a Thermo Nicolet 5700 FT-IR microscope Centaurus spectrophotometer.

## 2. $^1\text{H}$ , $^{13}\text{C}$ , NOE and 2D-NMR Spectral Copies

JEOL ECZ400S  $^1\text{H}$ -NMR IN  $\text{CDCl}_3$  LXVC-13 170505

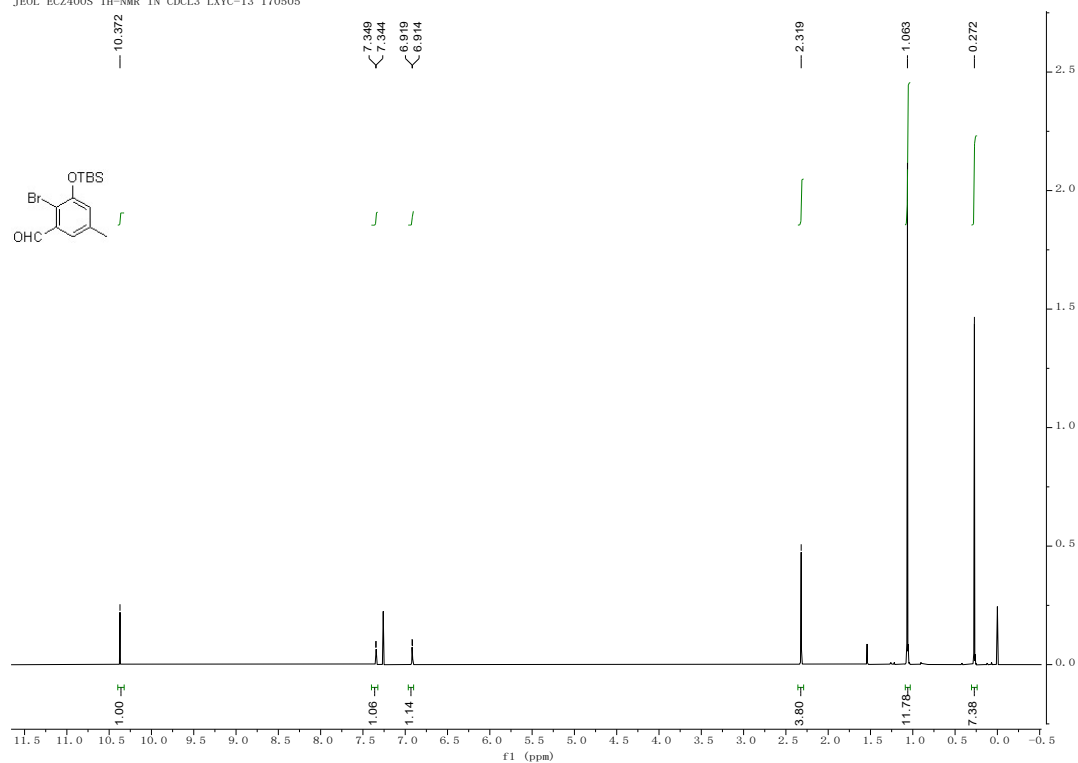

$^1\text{H}$  NMR spectra of compound **8**

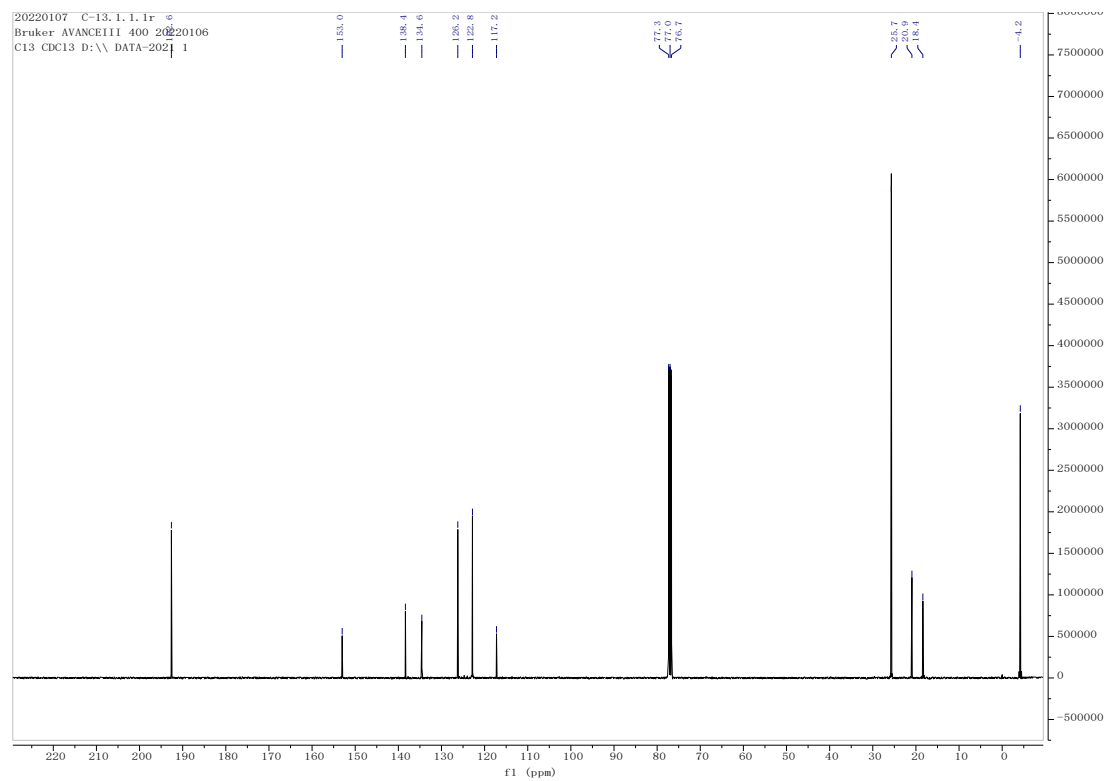

$^{13}\text{C}$  NMR spectra of compound **8**

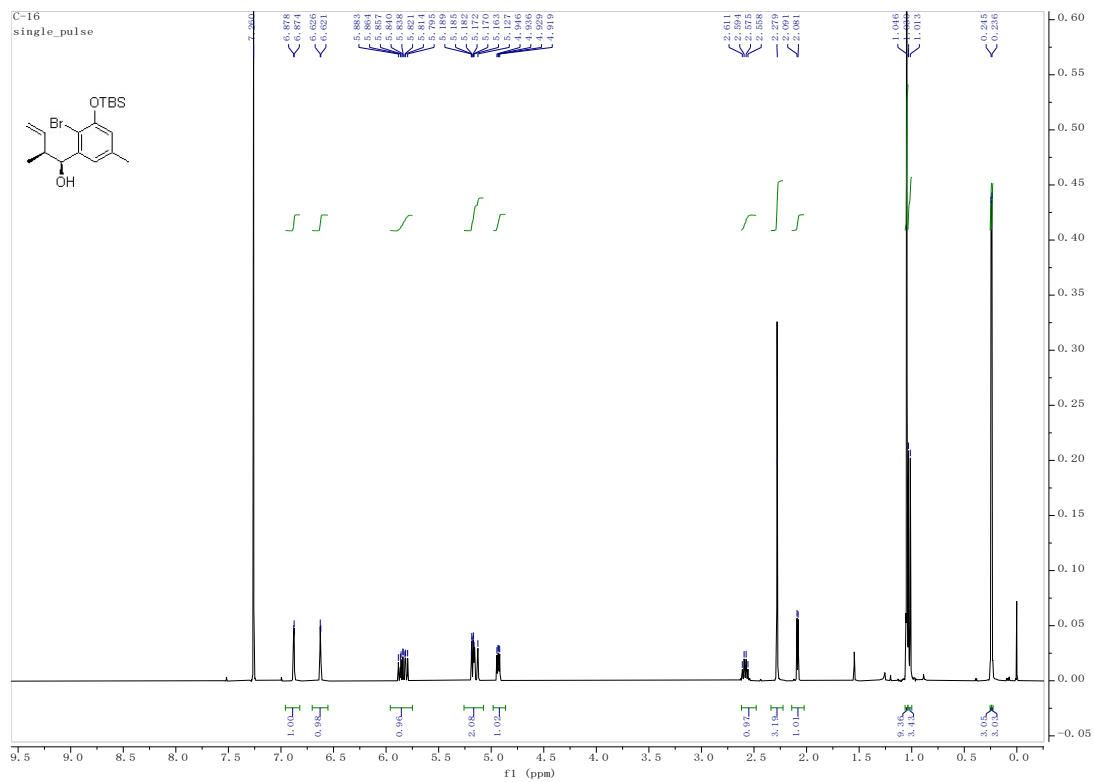

$^1\text{H}$  NMR spectra of compound ( $\pm$ ) 5

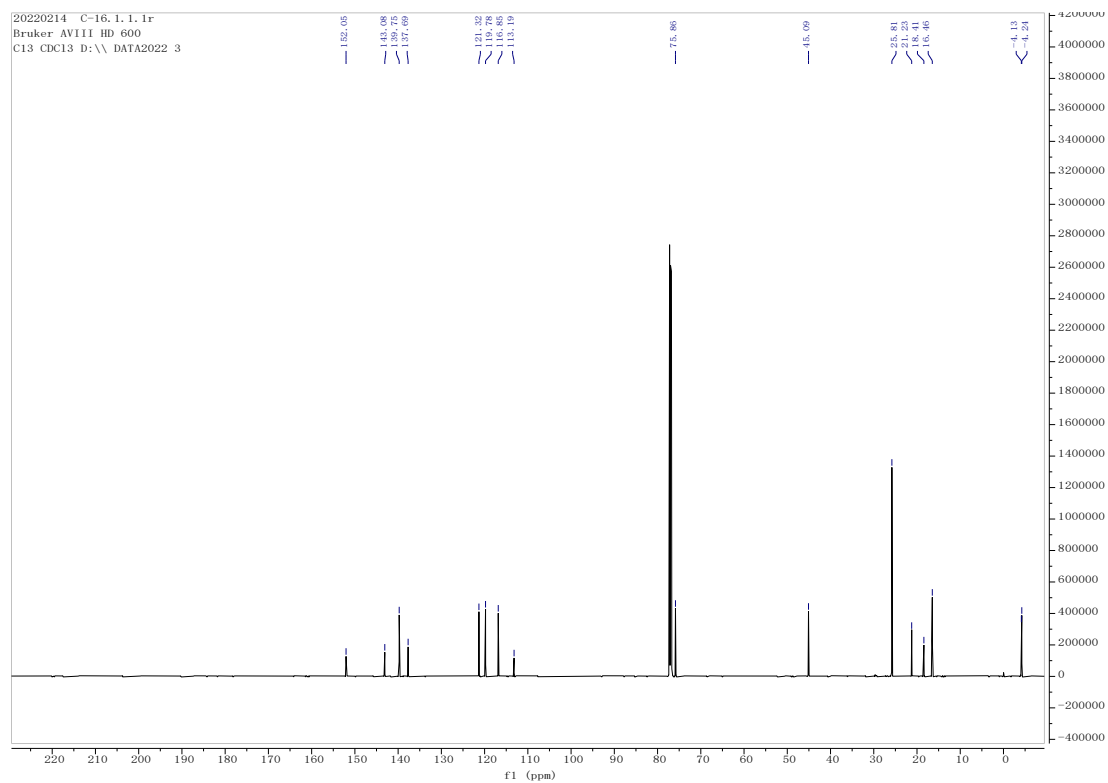

$^{13}\text{C}$  NMR spectra of compound ( $\pm$ ) 5

JEOL ECZ400S 1H-NMR IN CDCL3 LXJET-11-1 160315

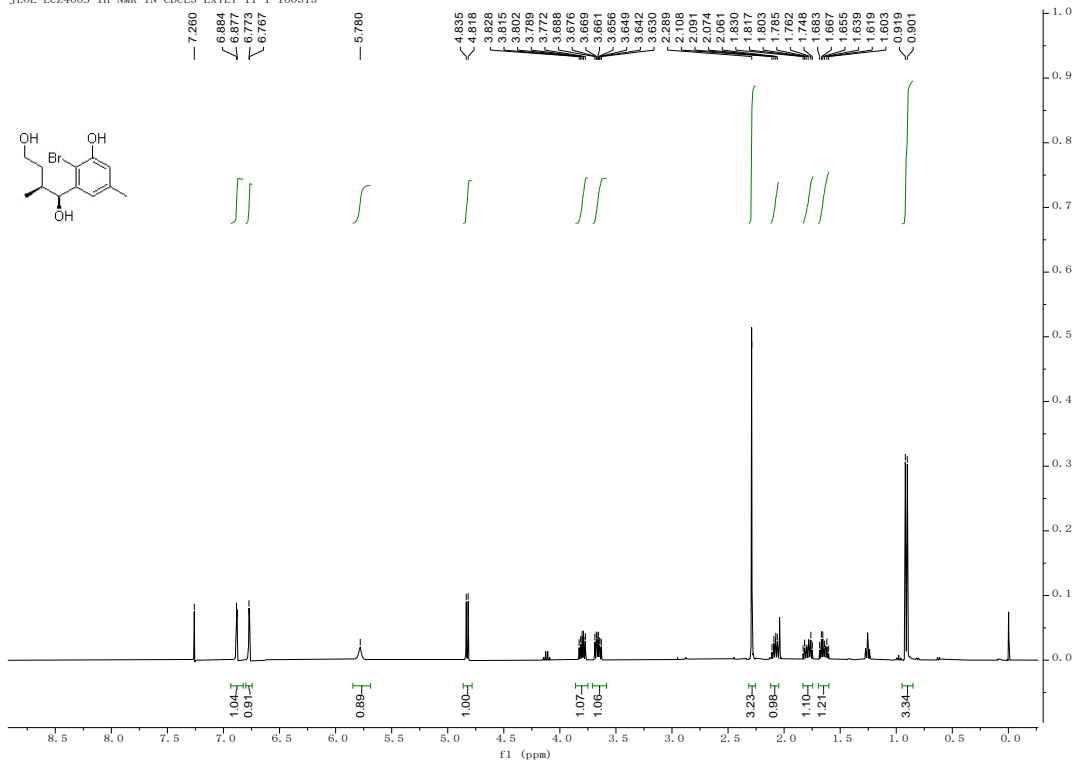

<sup>1</sup>H NMR spectra of compound (±) 4

Mercury-600 1H-NMR IN CDCL3 LXC-18 170602

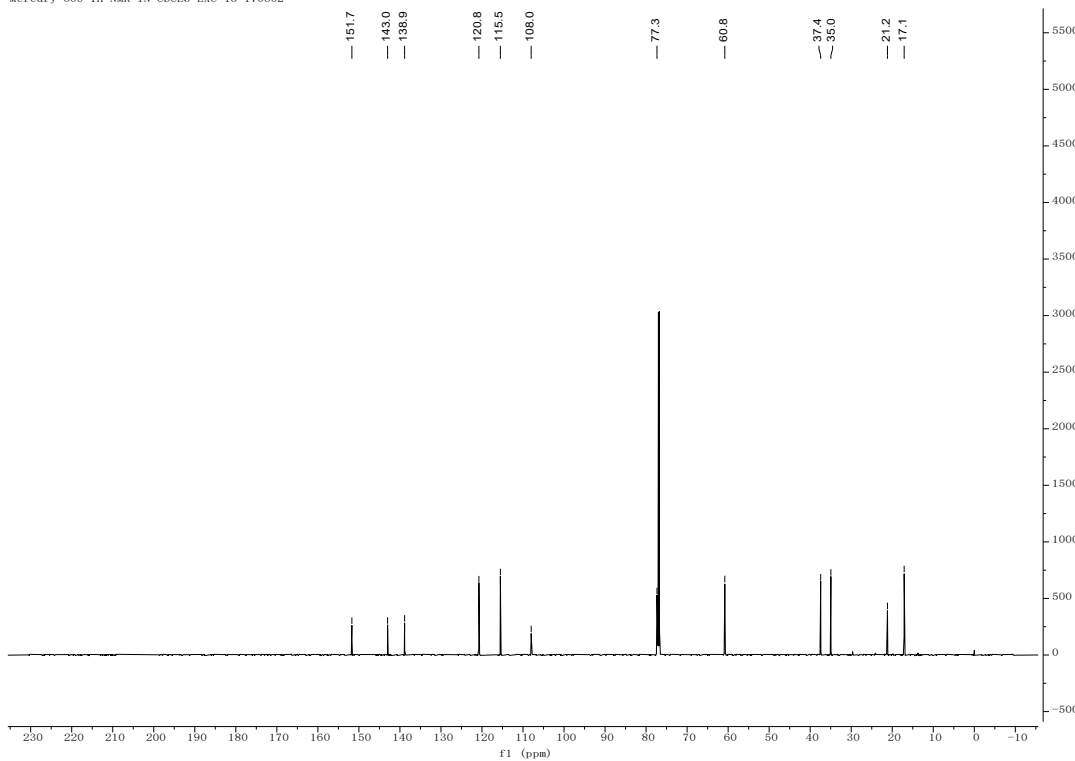

<sup>13</sup>C NMR spectra of compound (±) 4

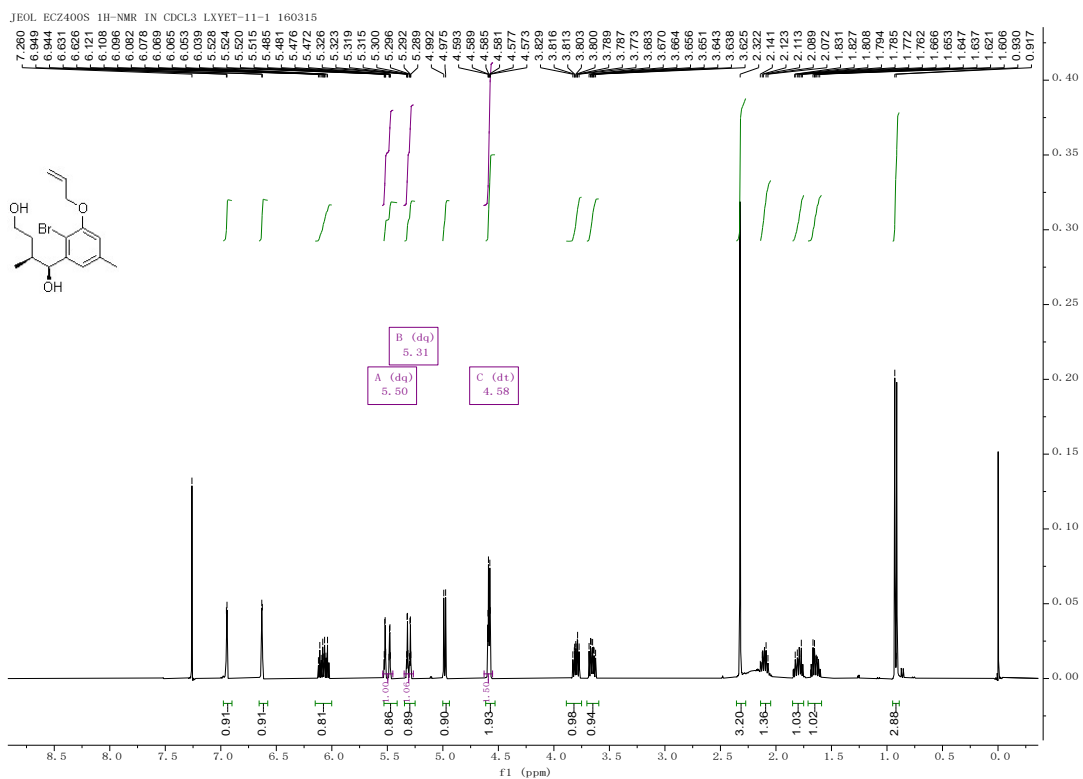

<sup>1</sup>H NMR spectra of compound (±) 10

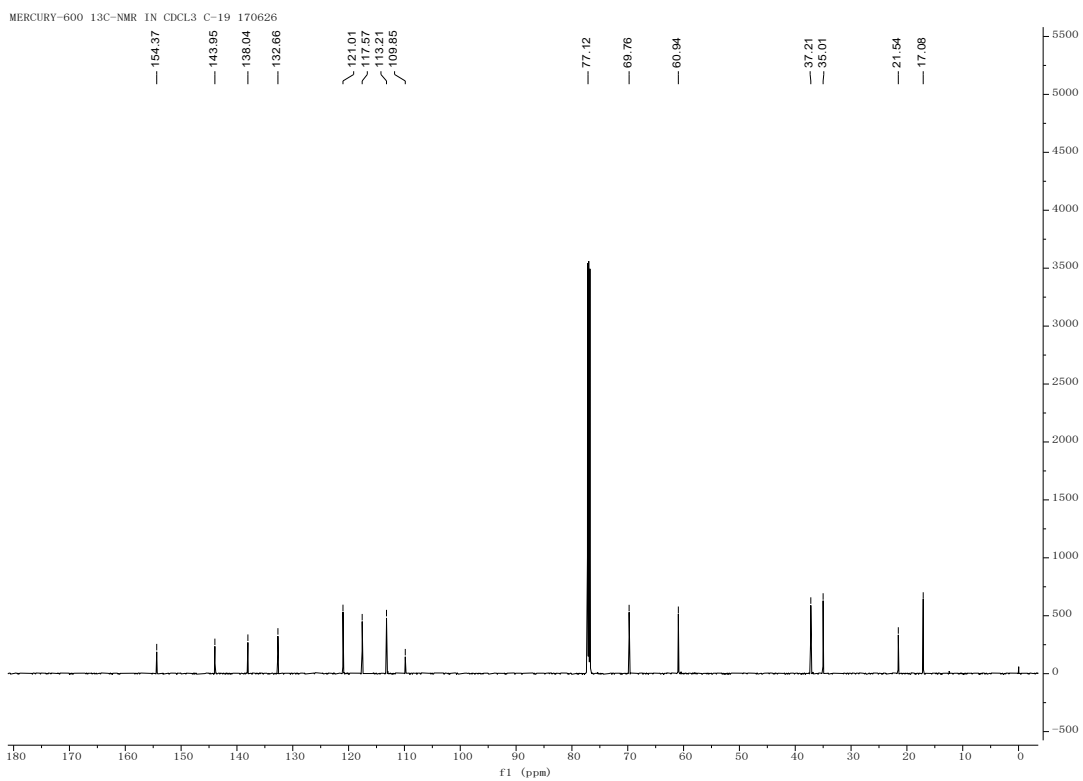

<sup>13</sup>C NMR spectra of compound (±) 10

JEOL ECZ400S 1H-NMR IN CDCL3 LXVC-20 170608

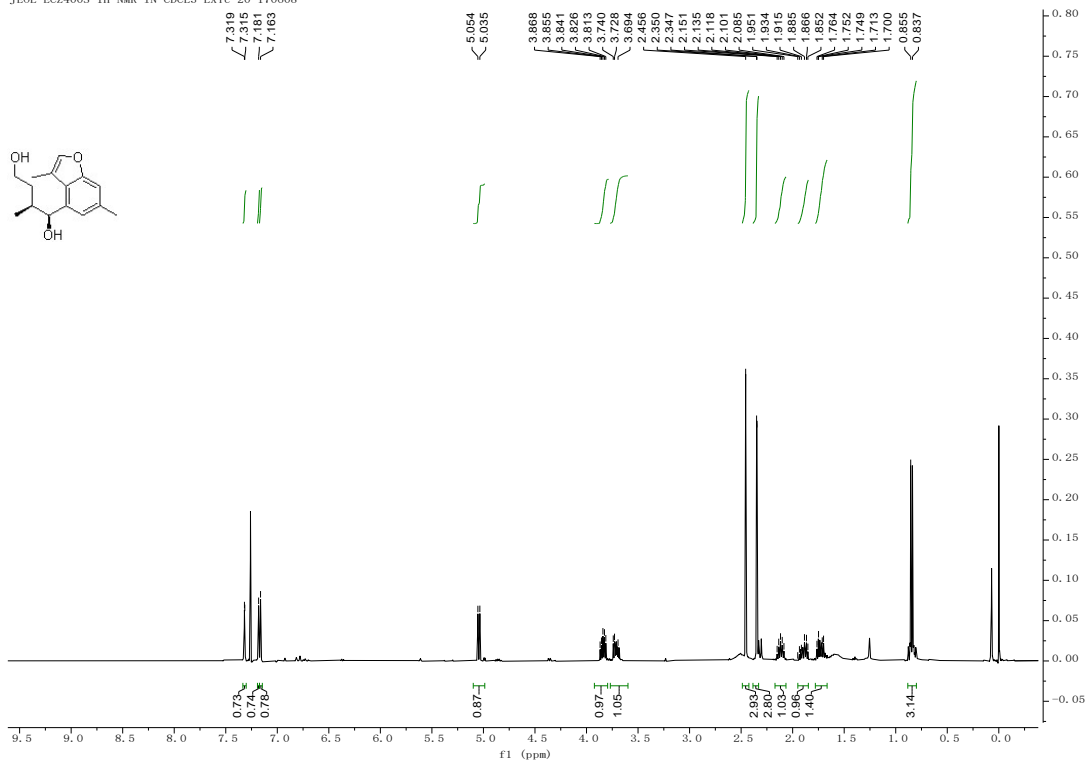

<sup>1</sup>H NMR spectra of compound (±) 11

Mercury-600 13C-NMR IN CDCL3 LXVC-20 170615

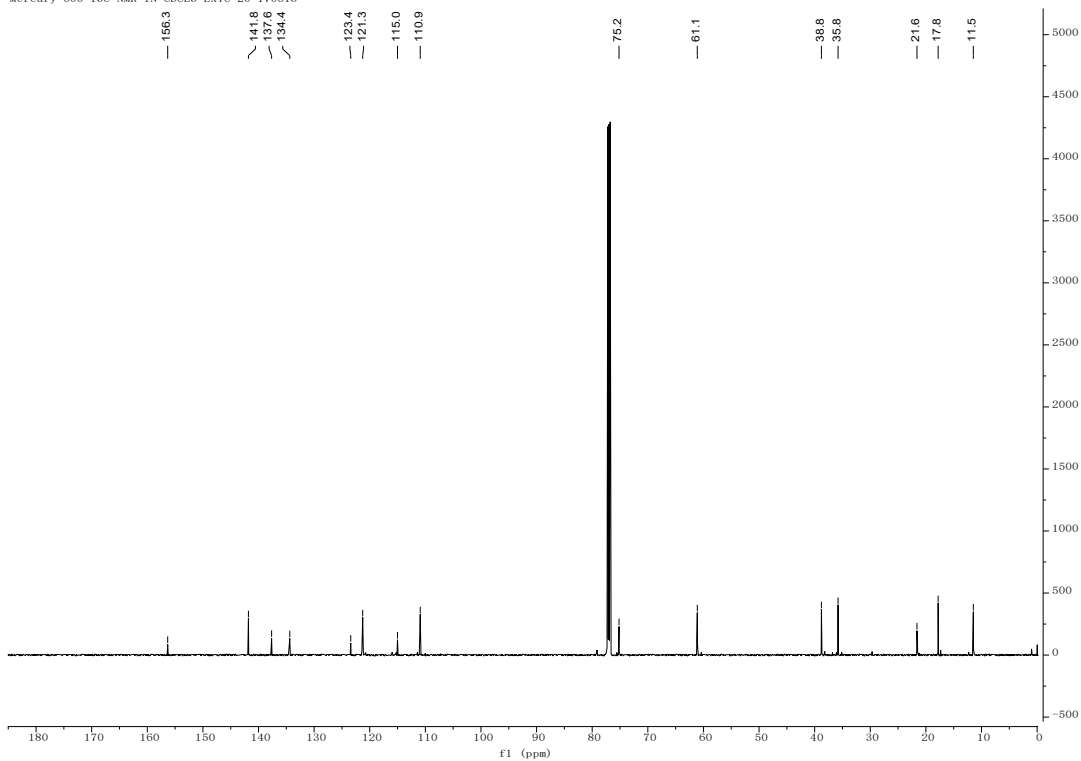

<sup>13</sup>C NMR spectra of compound (±) 11

JEOL ECZ400S 1H-NMR IN CDCl3 LXVET-11-1 160315

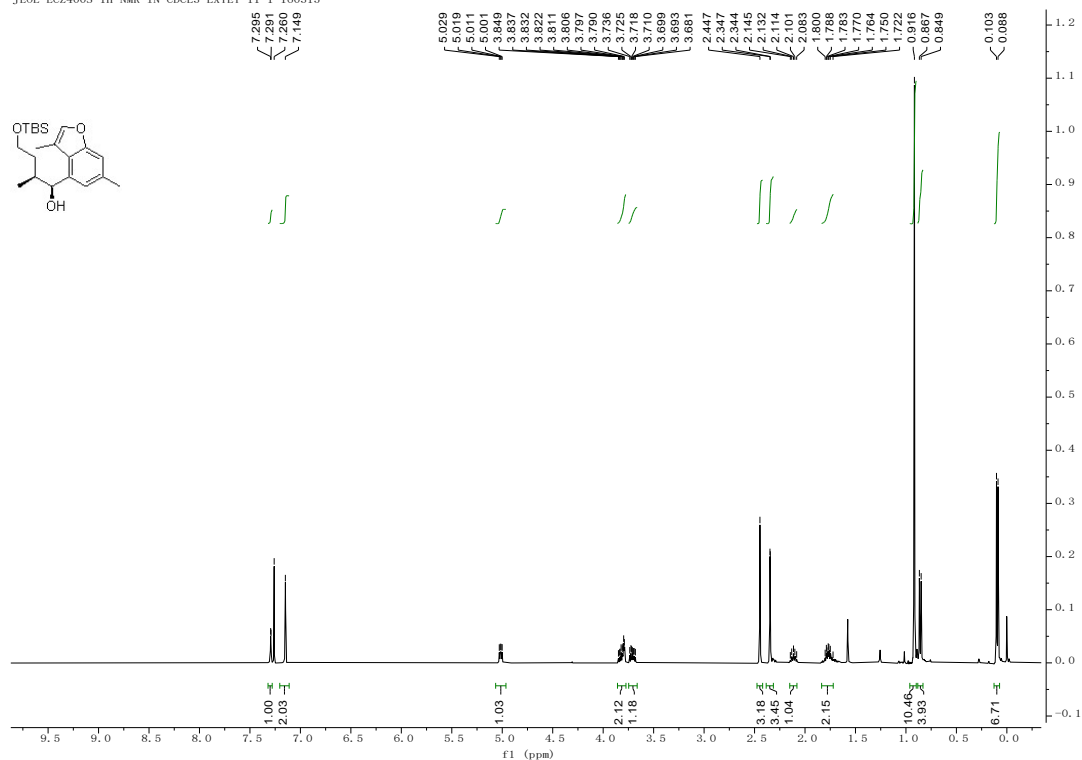

### <sup>1</sup>H NMR spectra of compound (±) 12

Mercury-600 13C-NMR IN CDCl3 C-26 171024

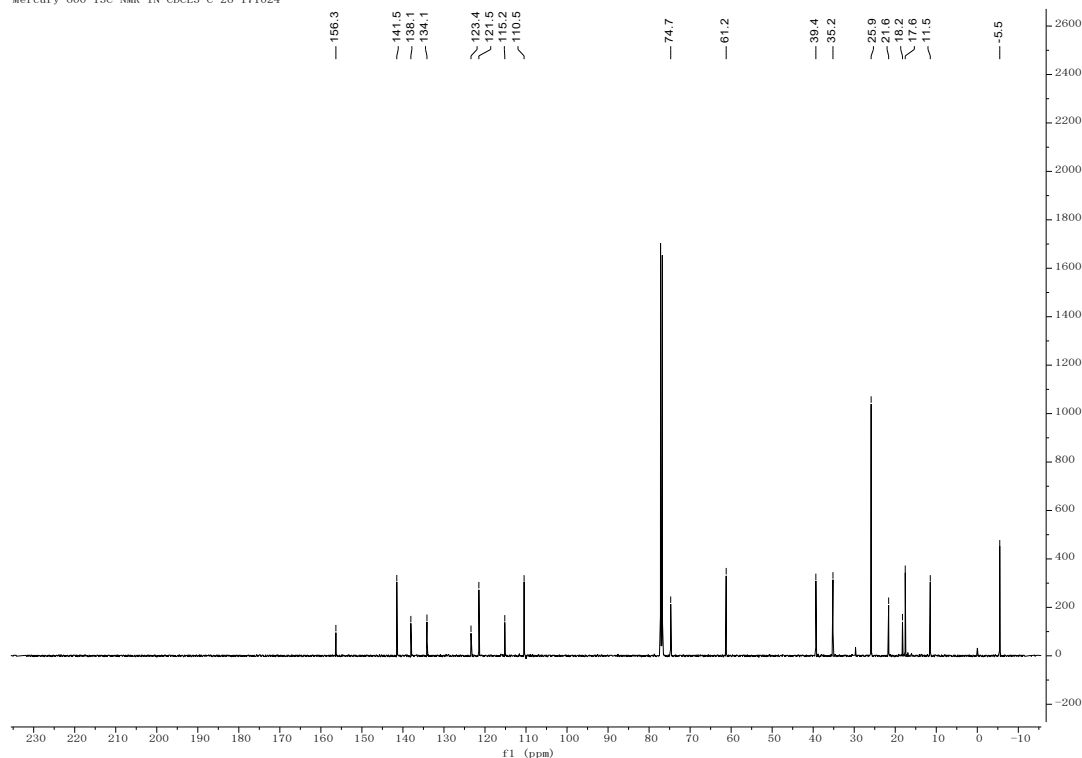

### <sup>13</sup>C NMR spectra of compound (±) 12



JEOL ECZ400S 1H-NMR IN CDCL3 LXVET-11-1 160315

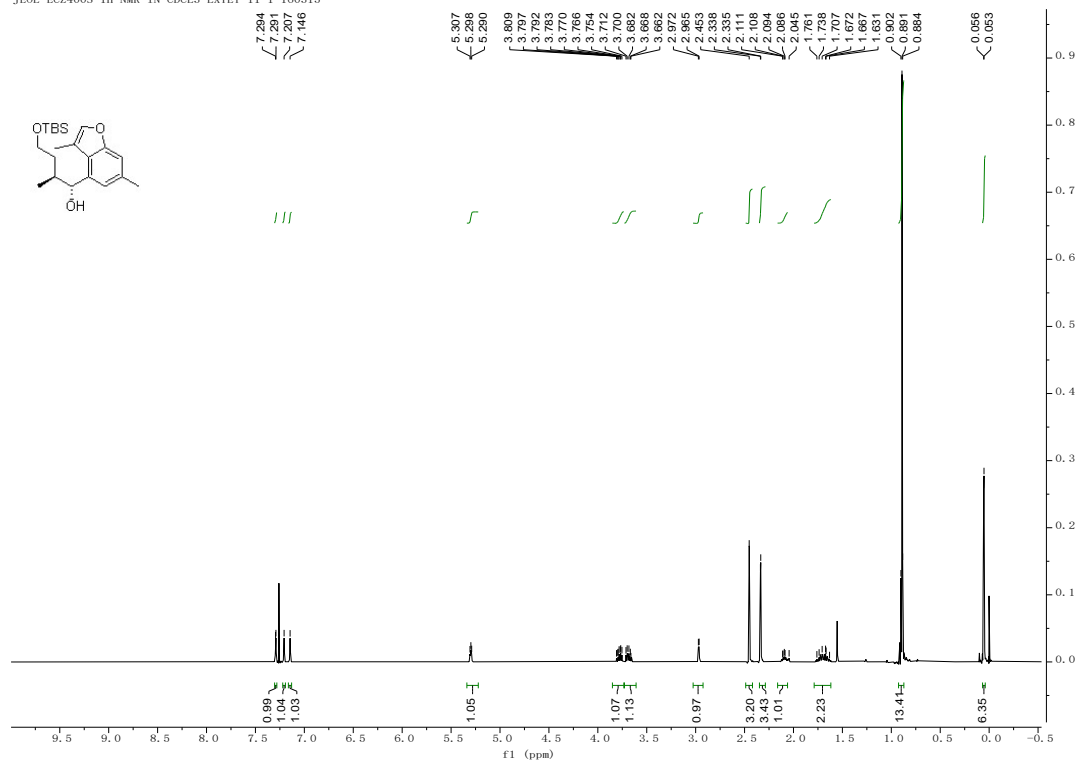

<sup>1</sup>H NMR spectra of compound (±) **14**

JEOL ECZ400S 1H-NMR IN CDCL3 LXVET-11-1 160315

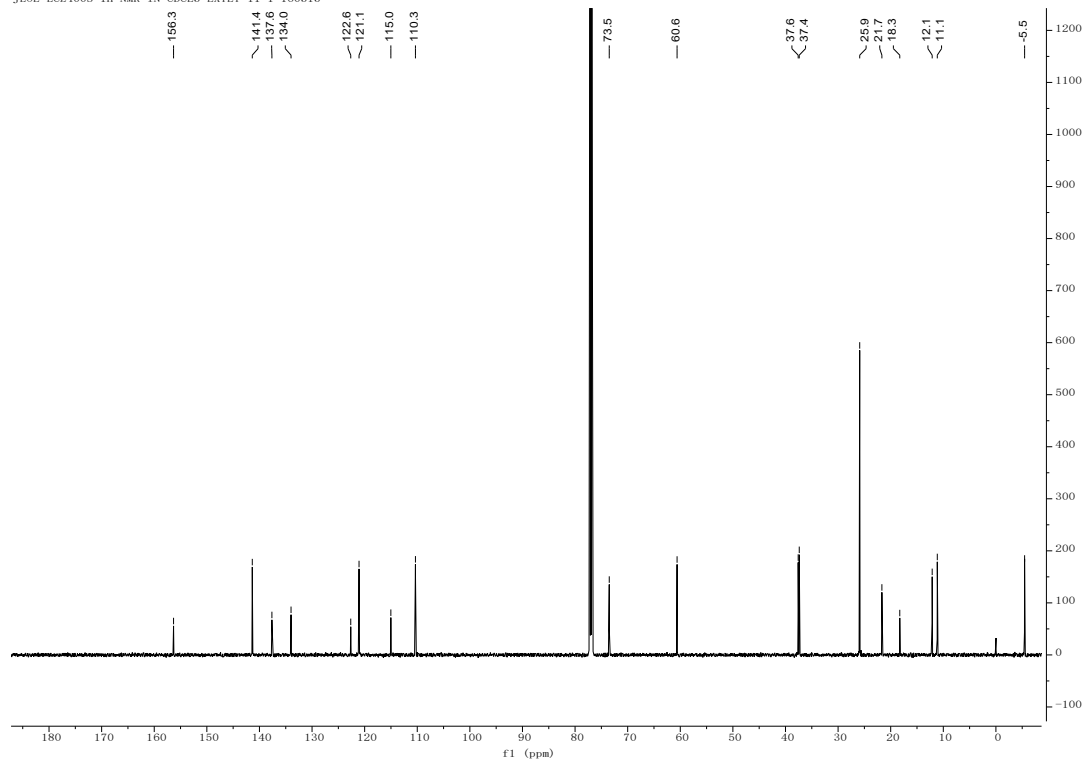

<sup>13</sup>C NMR spectra of compound (±) **14**

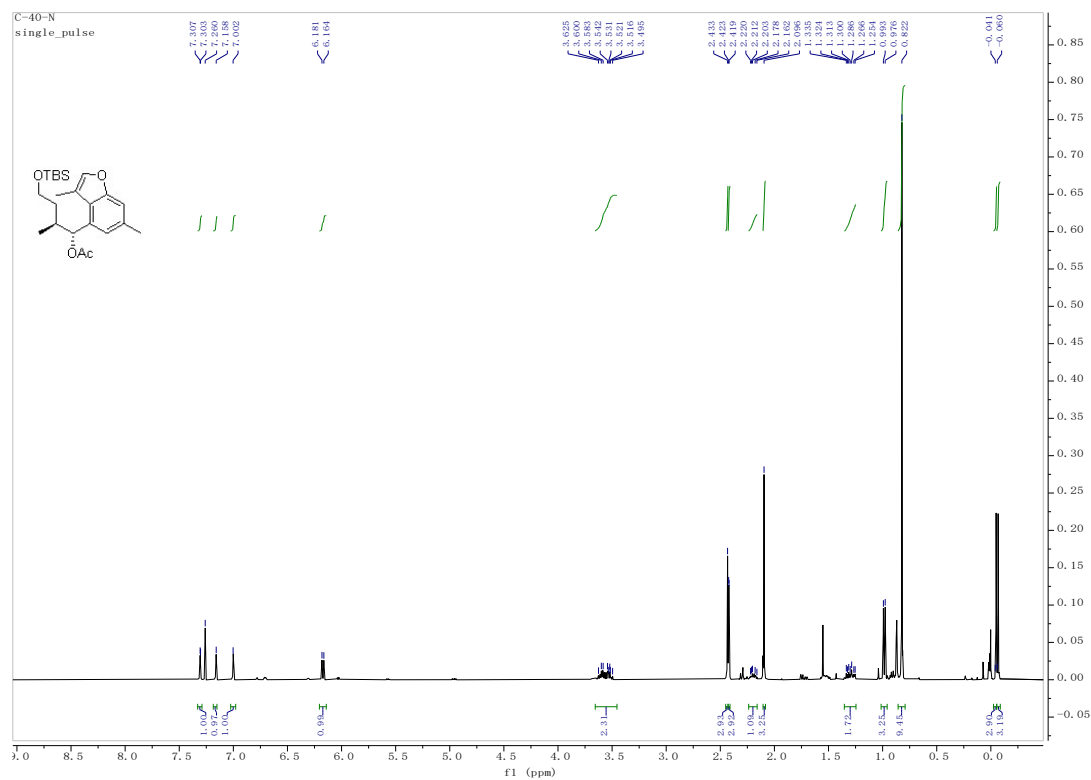

<sup>1</sup>H NMR spectra of compound (±) **3**

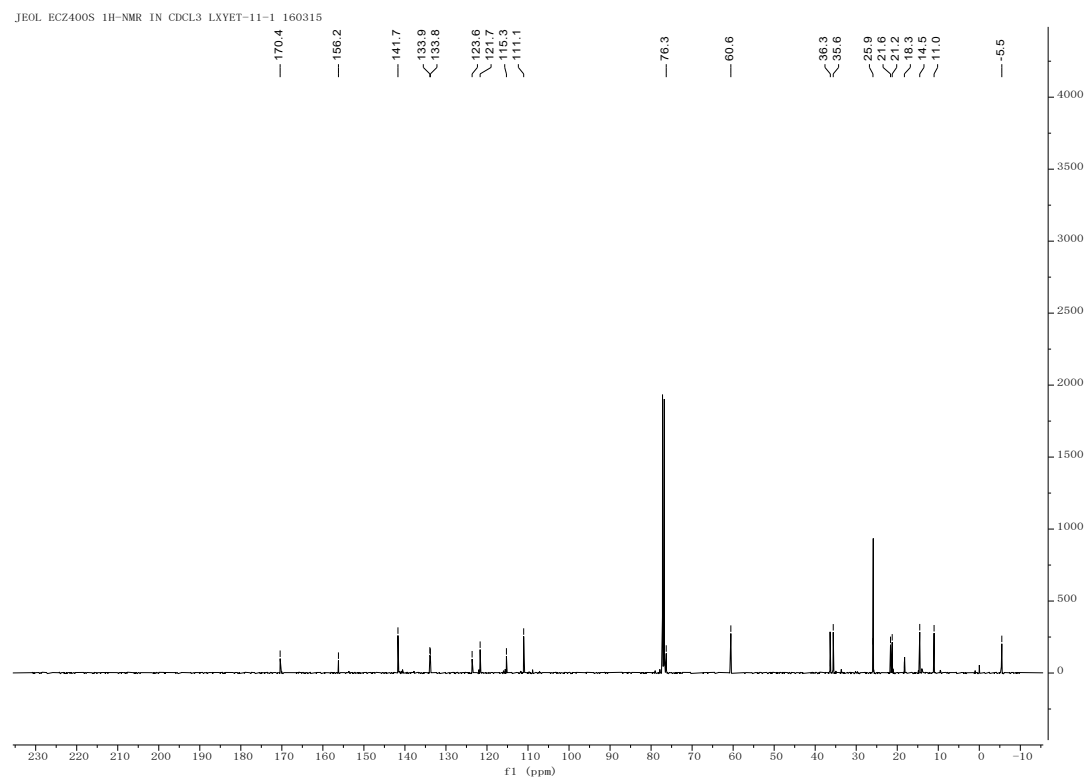

<sup>13</sup>C NMR spectra of compound (±) **3**

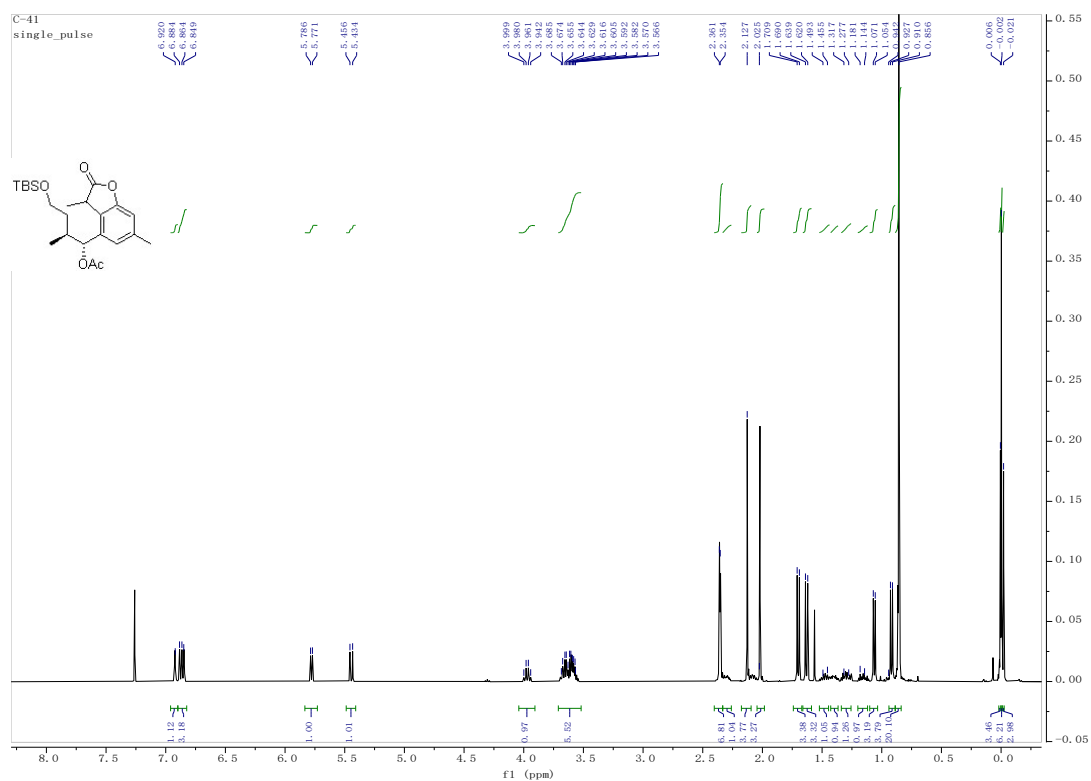

<sup>1</sup>H NMR spectra of compound (±) 15

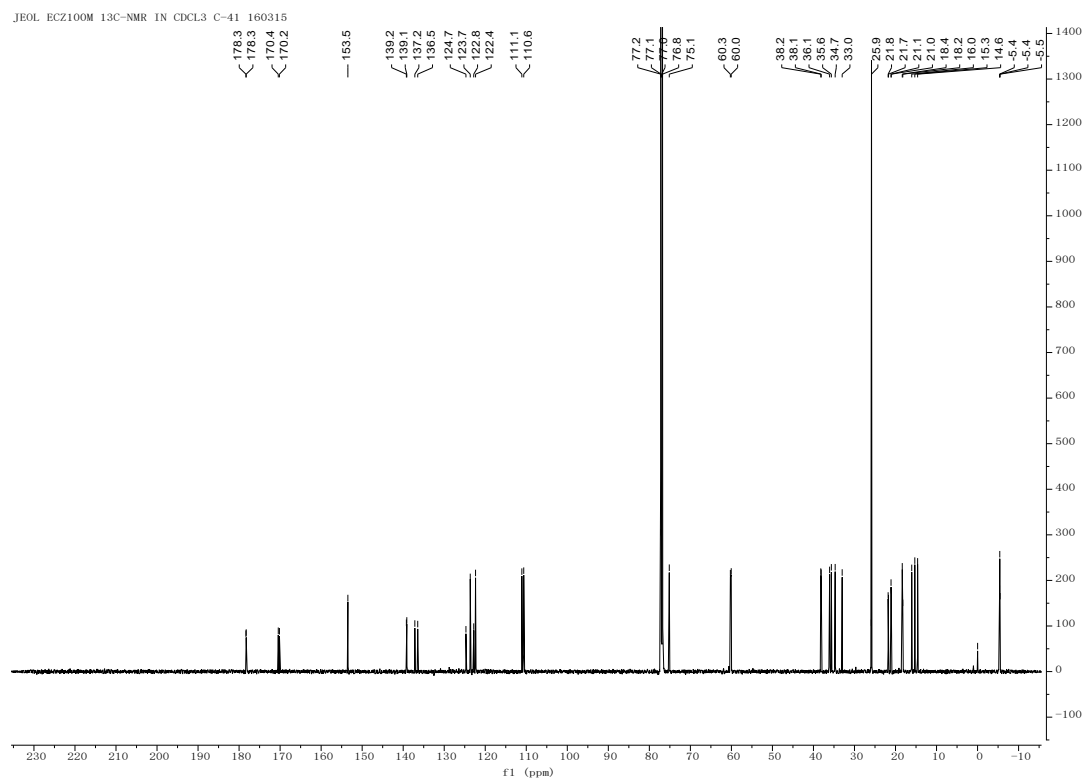

<sup>13</sup>C NMR spectra of compound (±) 15

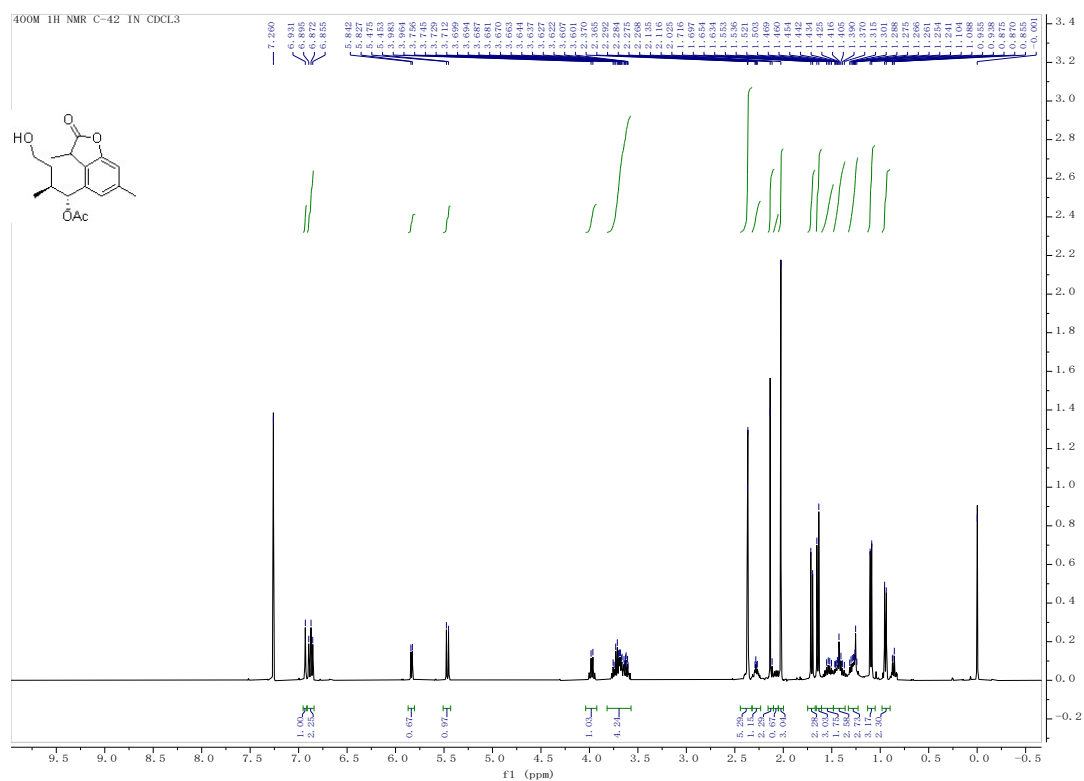

<sup>1</sup>H NMR spectra of compound (±) 16

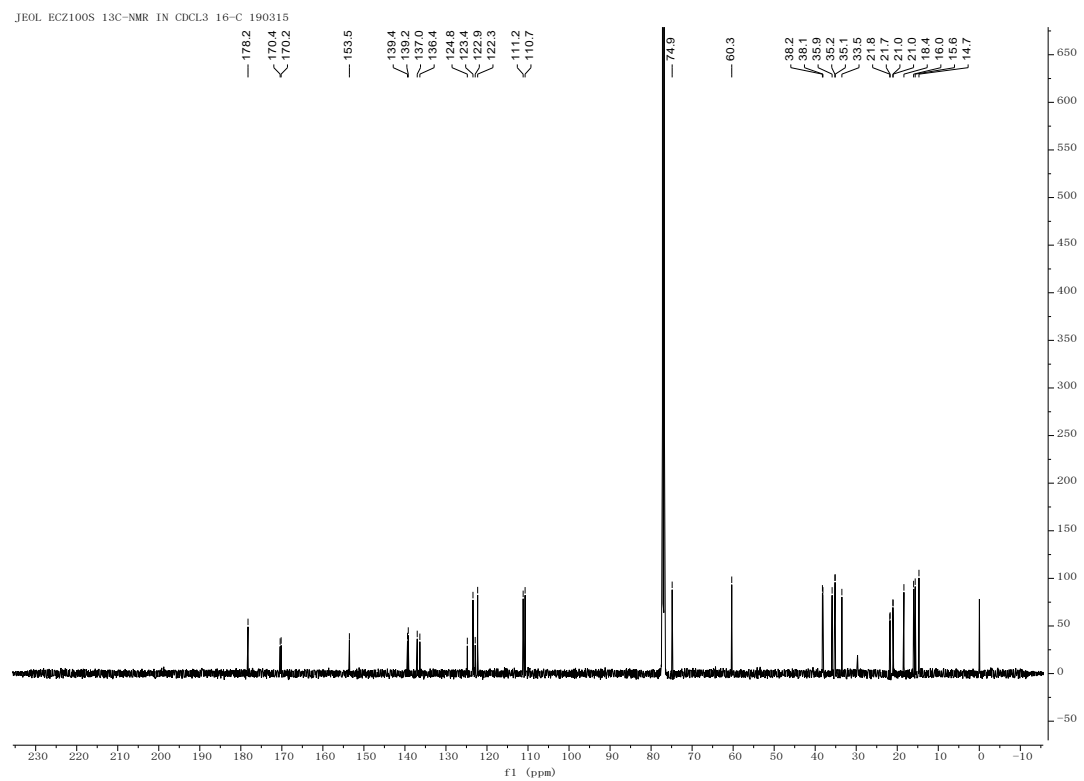

<sup>13</sup>C NMR spectra of compound (±) 16

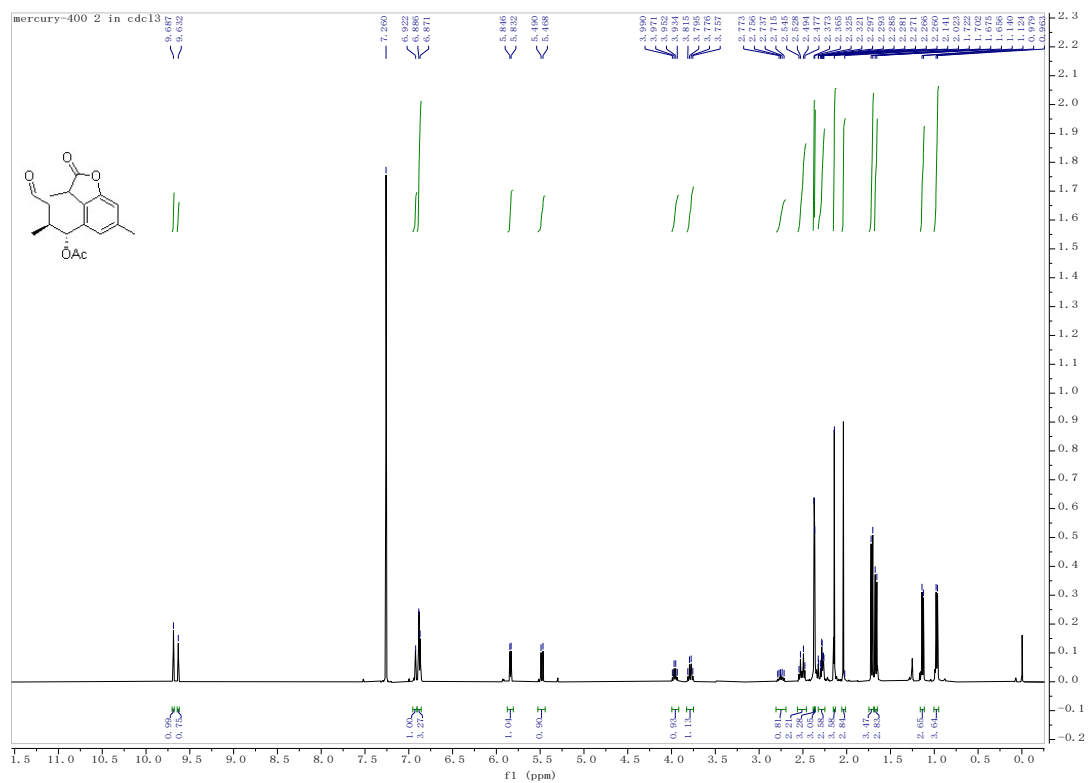

<sup>1</sup>H NMR spectra of compound (±) 2

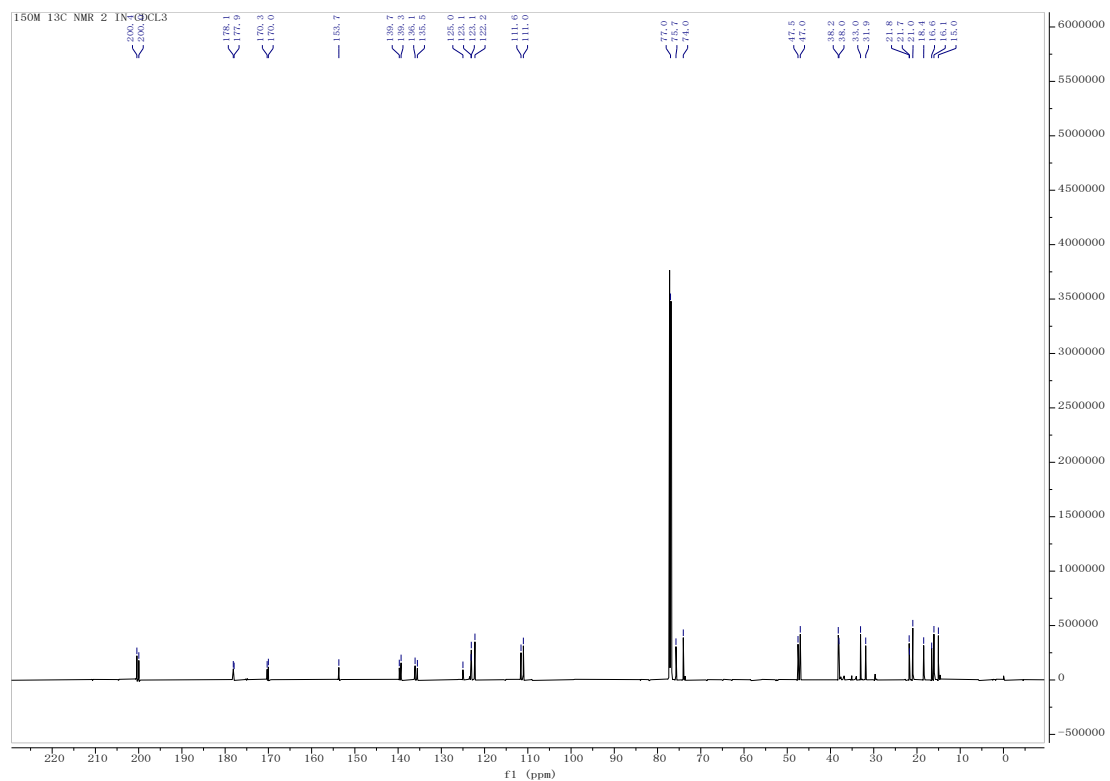

<sup>13</sup>C NMR spectra of compound (±) 2



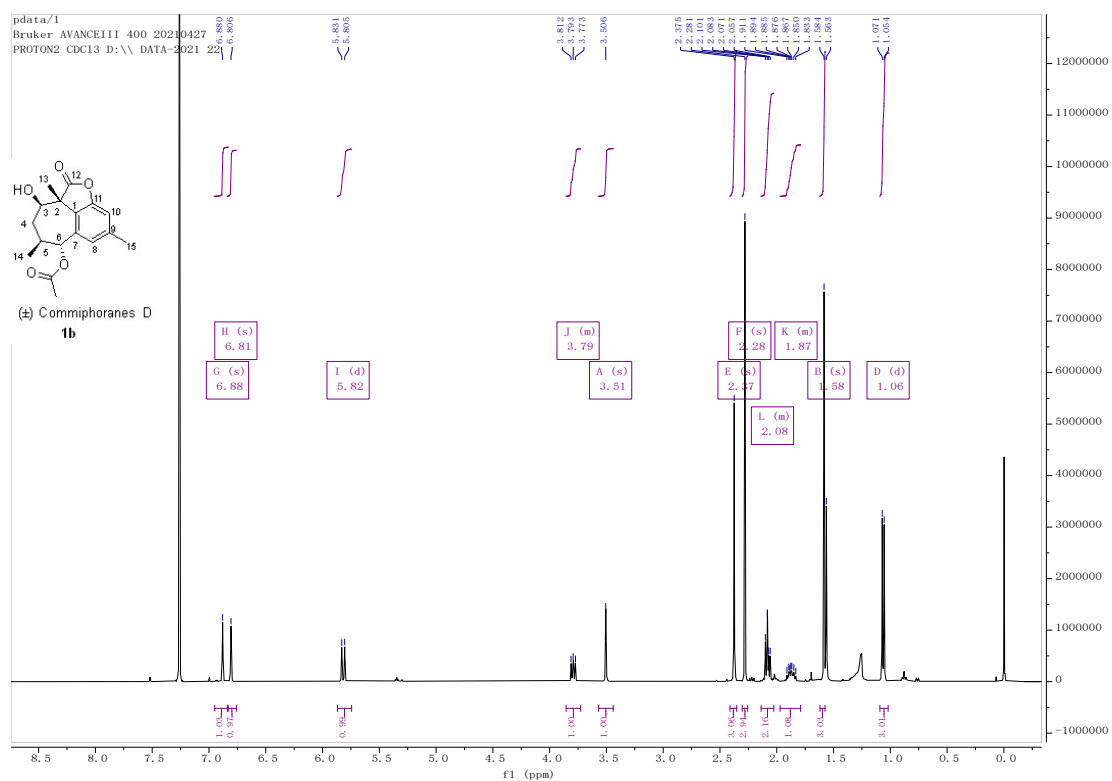

<sup>1</sup>H NMR spectra of compound **1b**

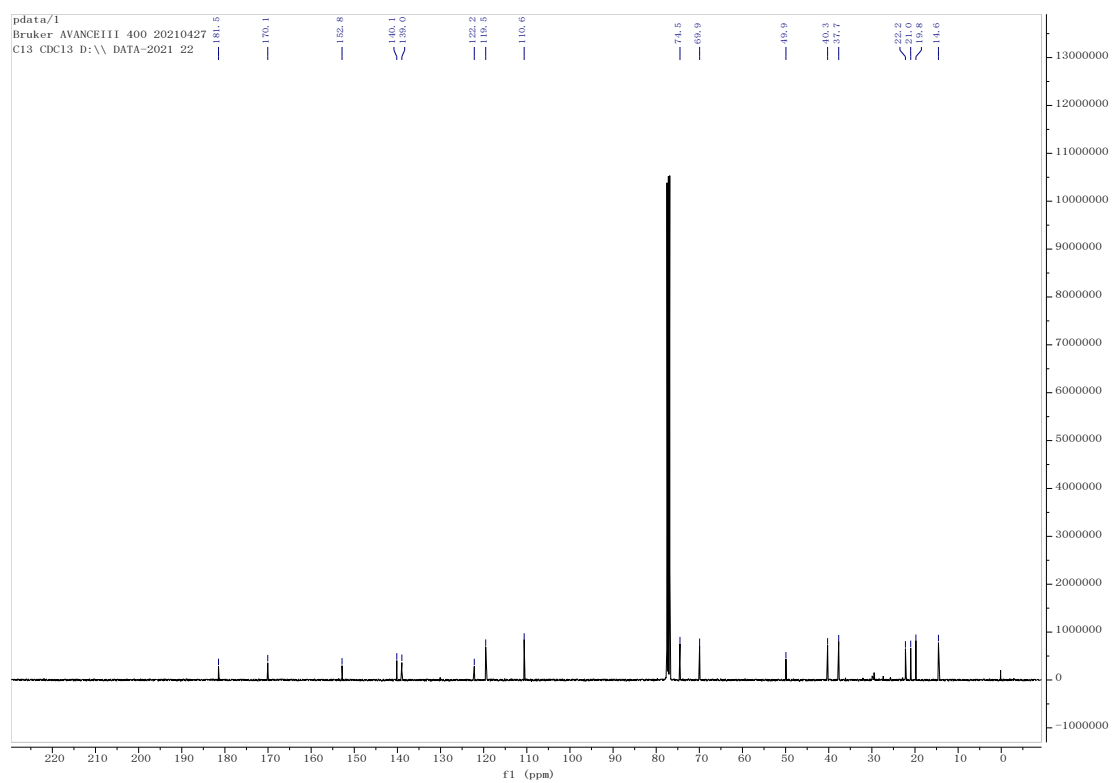

<sup>13</sup>C NMR spectra of compound **1b**

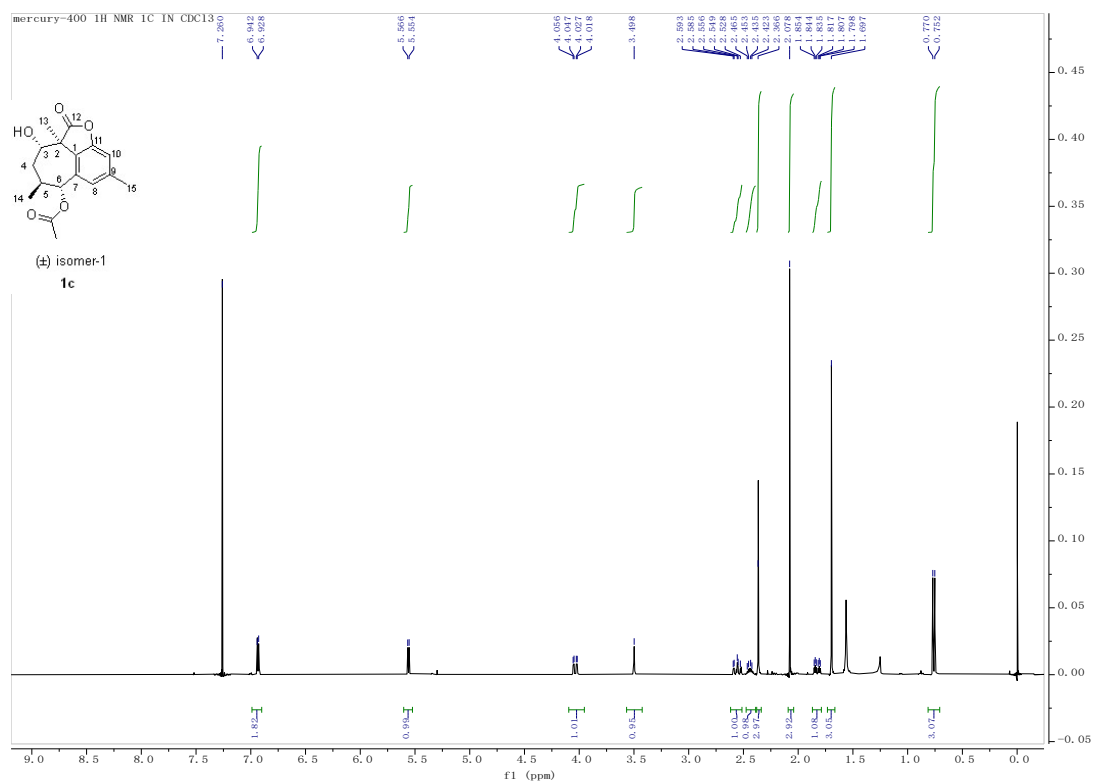

<sup>1</sup>H NMR spectra of compound **1c**

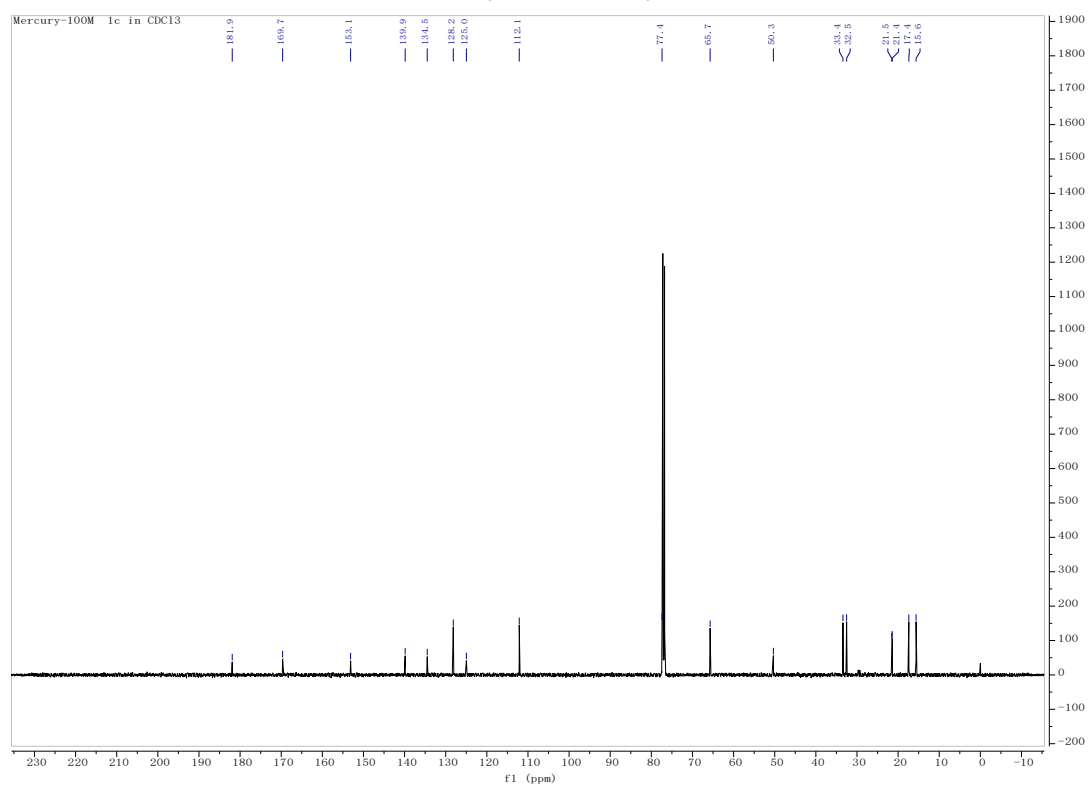

<sup>13</sup>C NMR spectra of compound **1c**



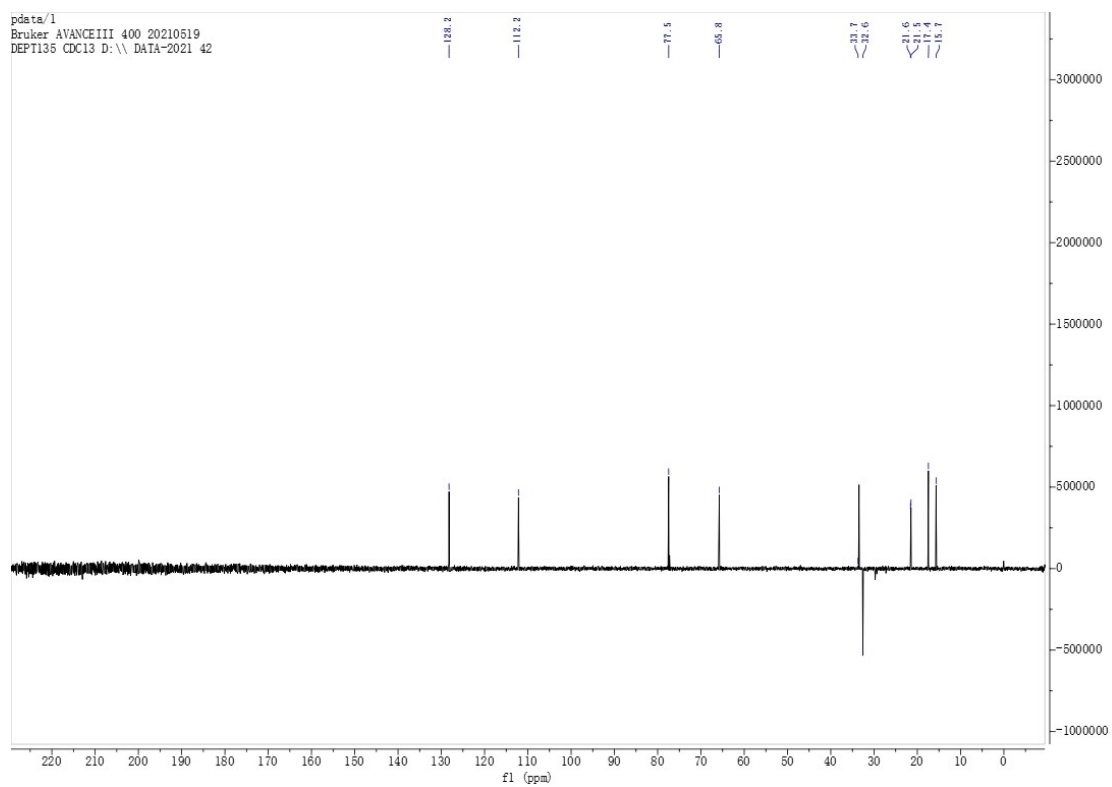

DEPT 135 spectra of compound **1c**

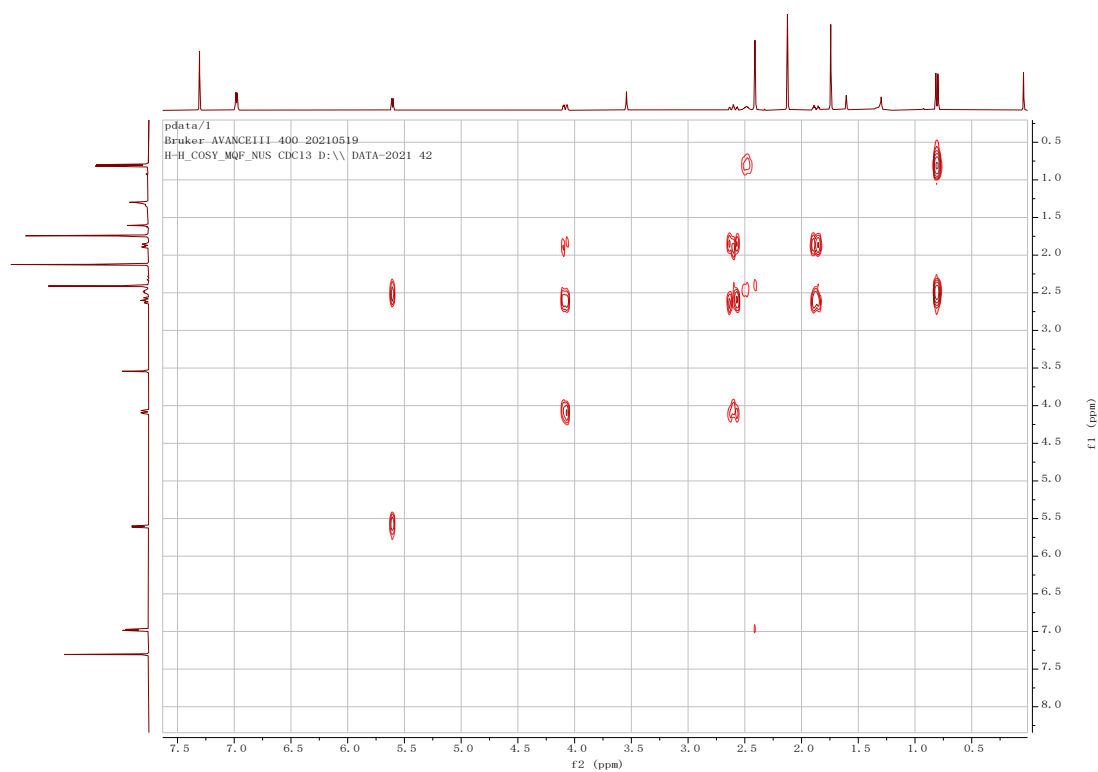

H-H cosy spectra of compound **1c**

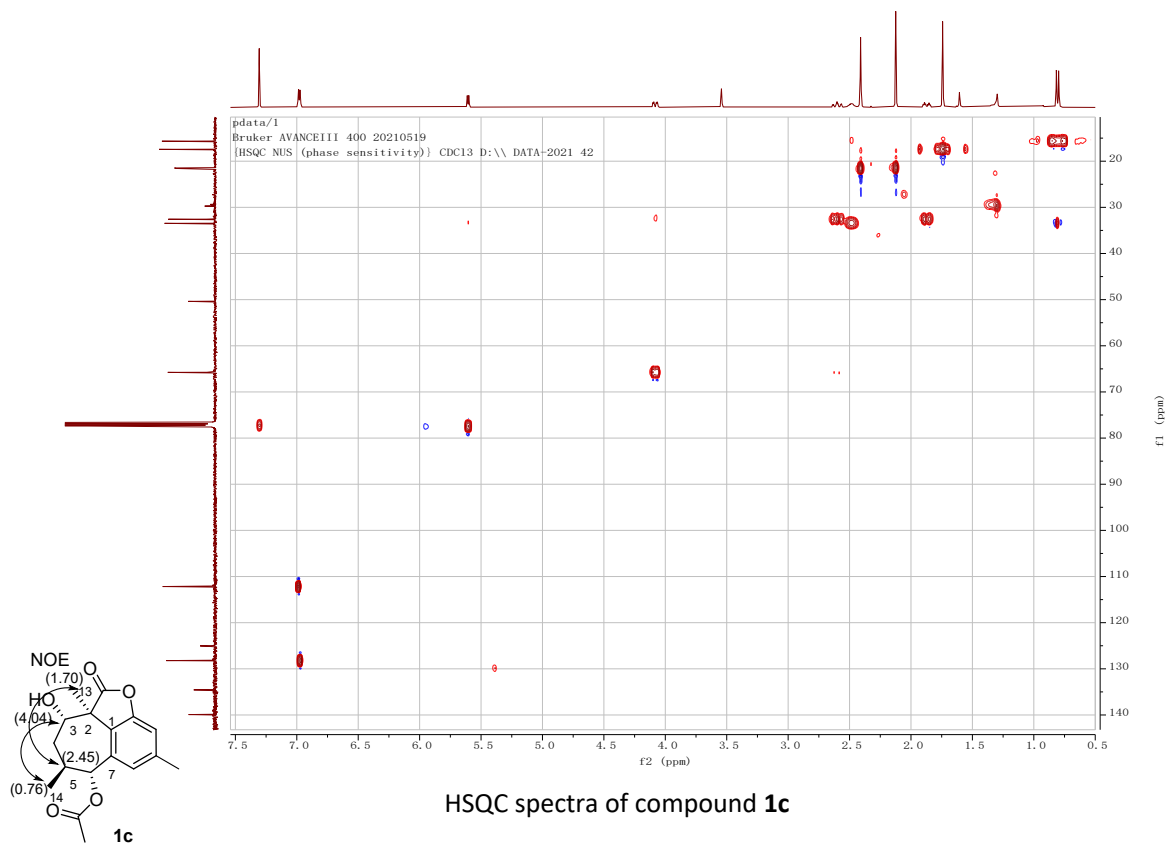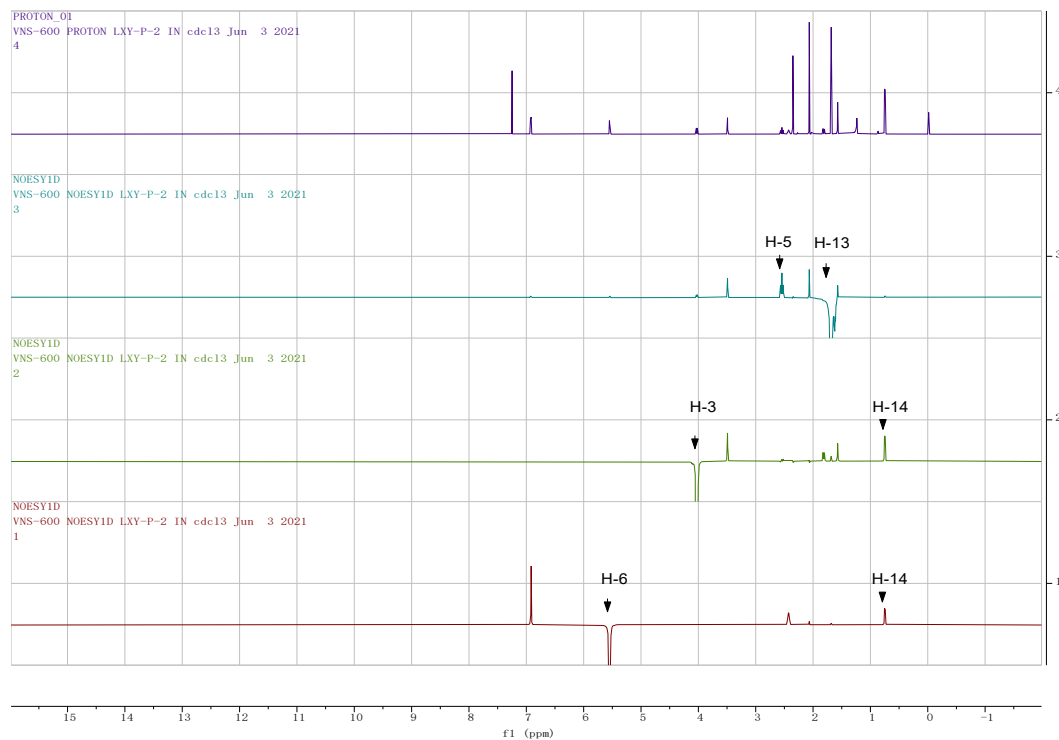

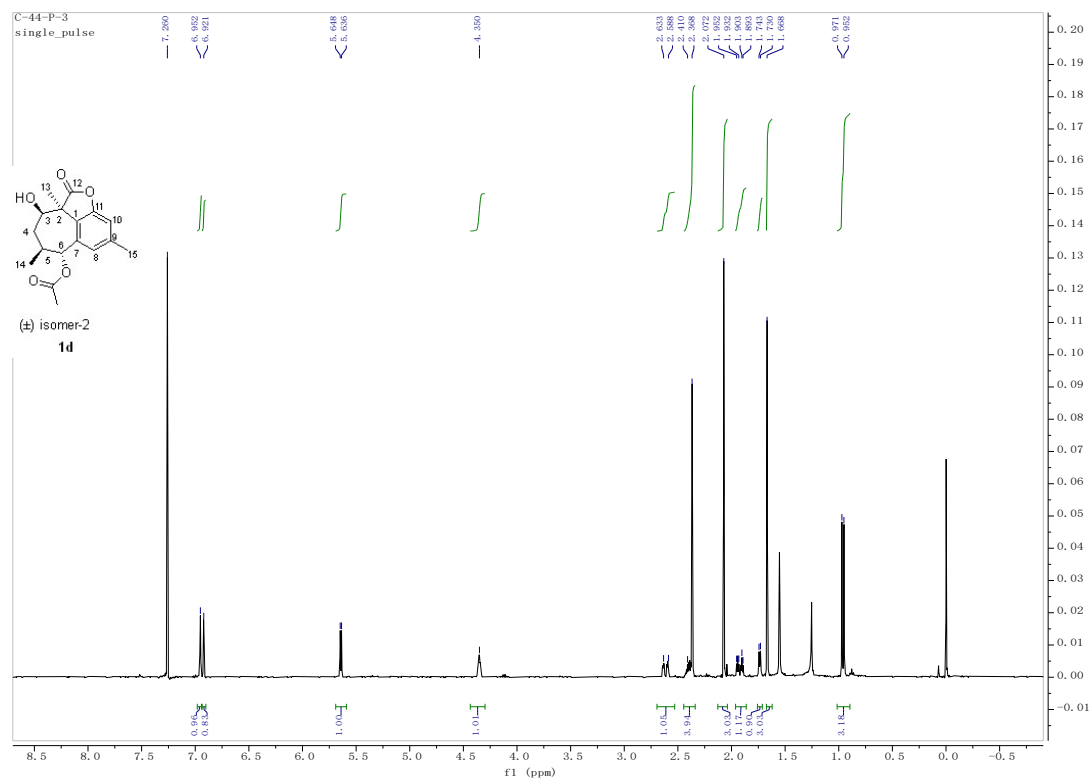

<sup>1</sup>H NMR spectra of compound **1d**

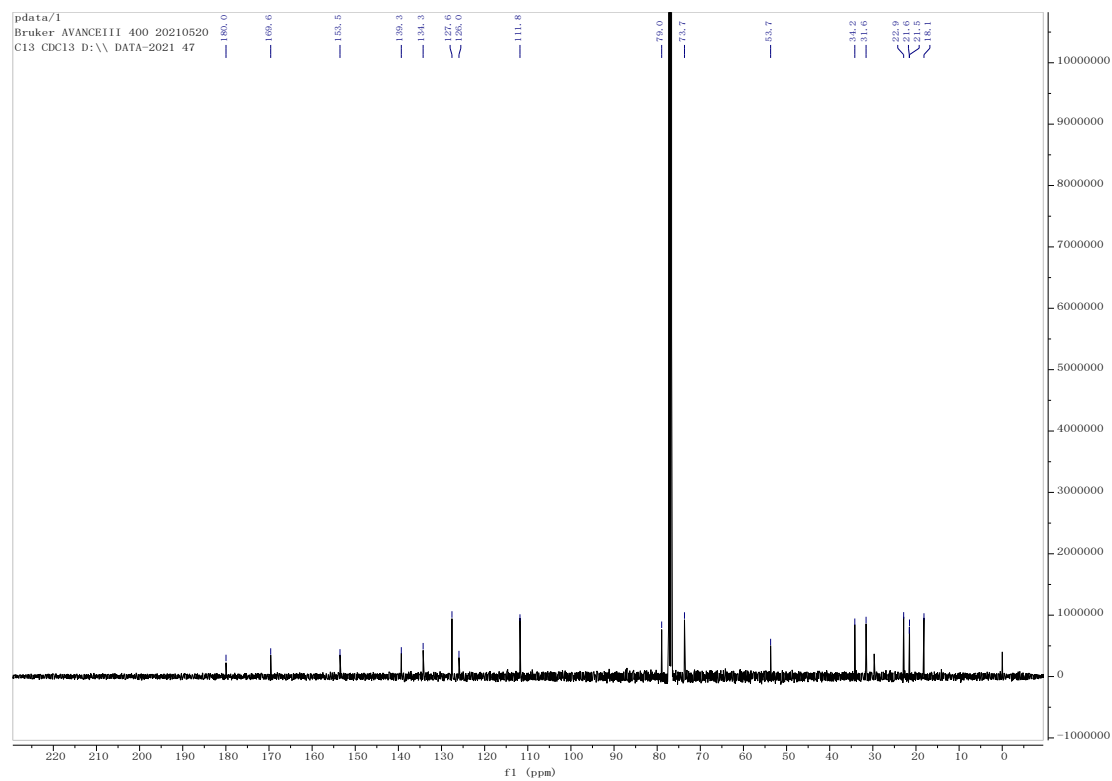

<sup>13</sup>C NMR spectra of compound **1d**

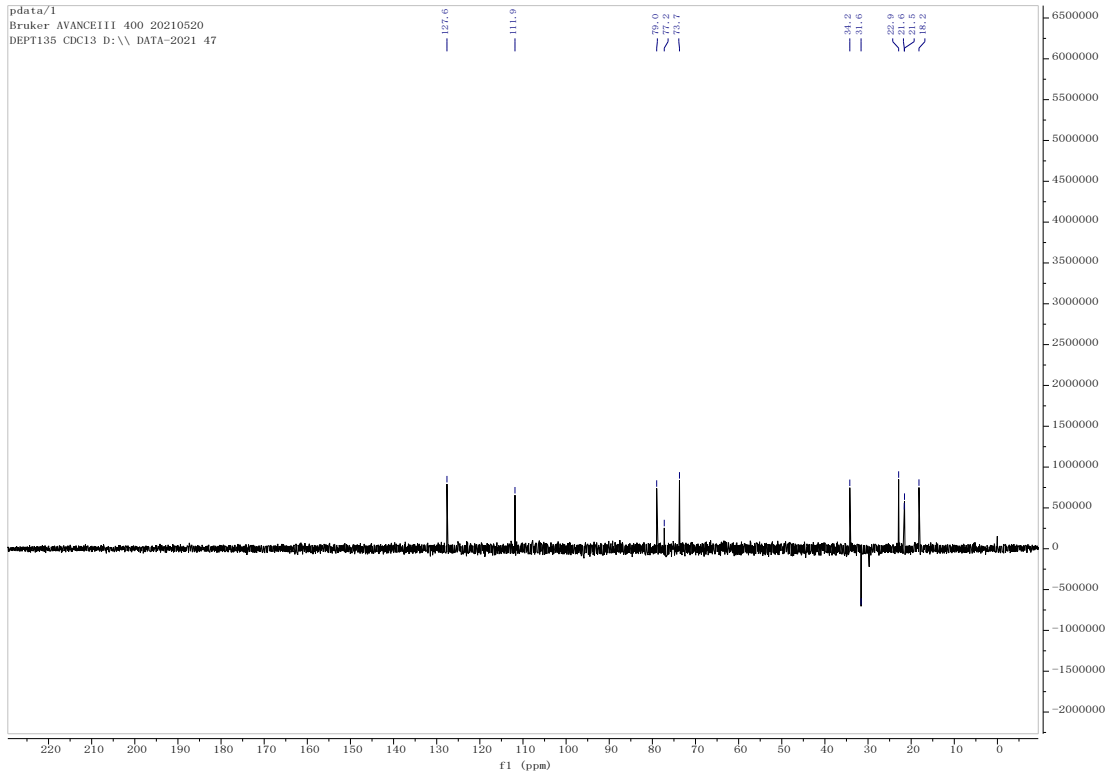

DEPT 135 spectra of compound **1d**

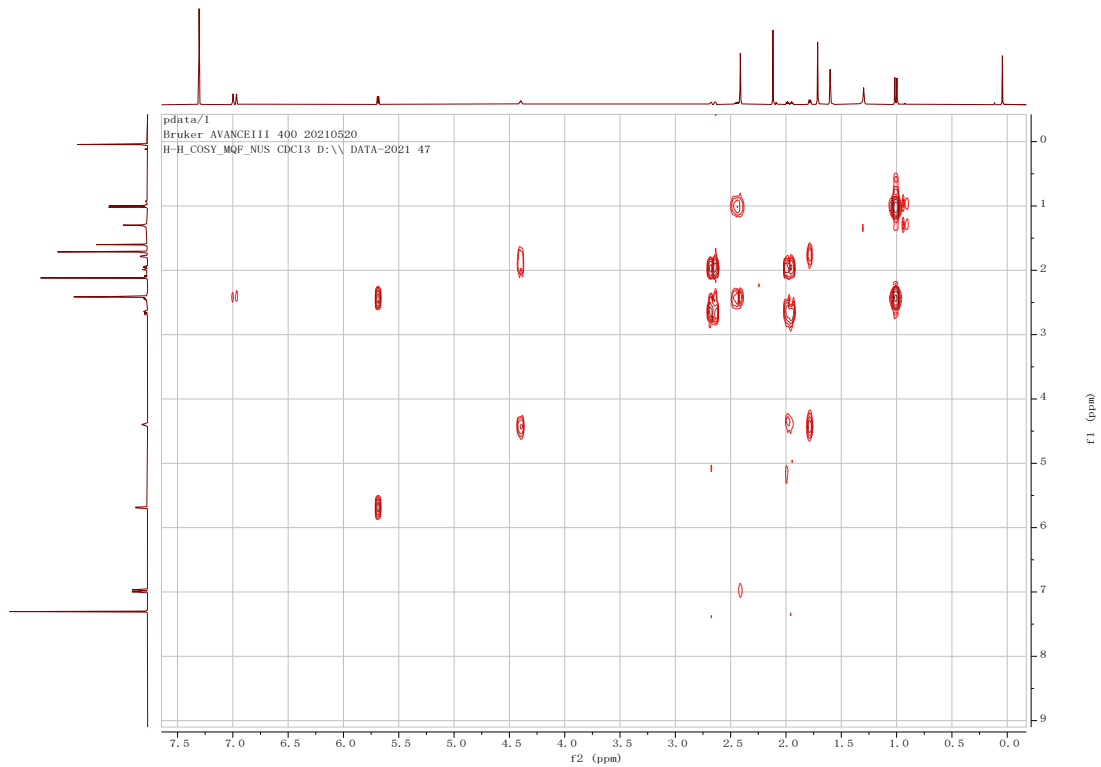

H-H cosy spectra of compound **1d**

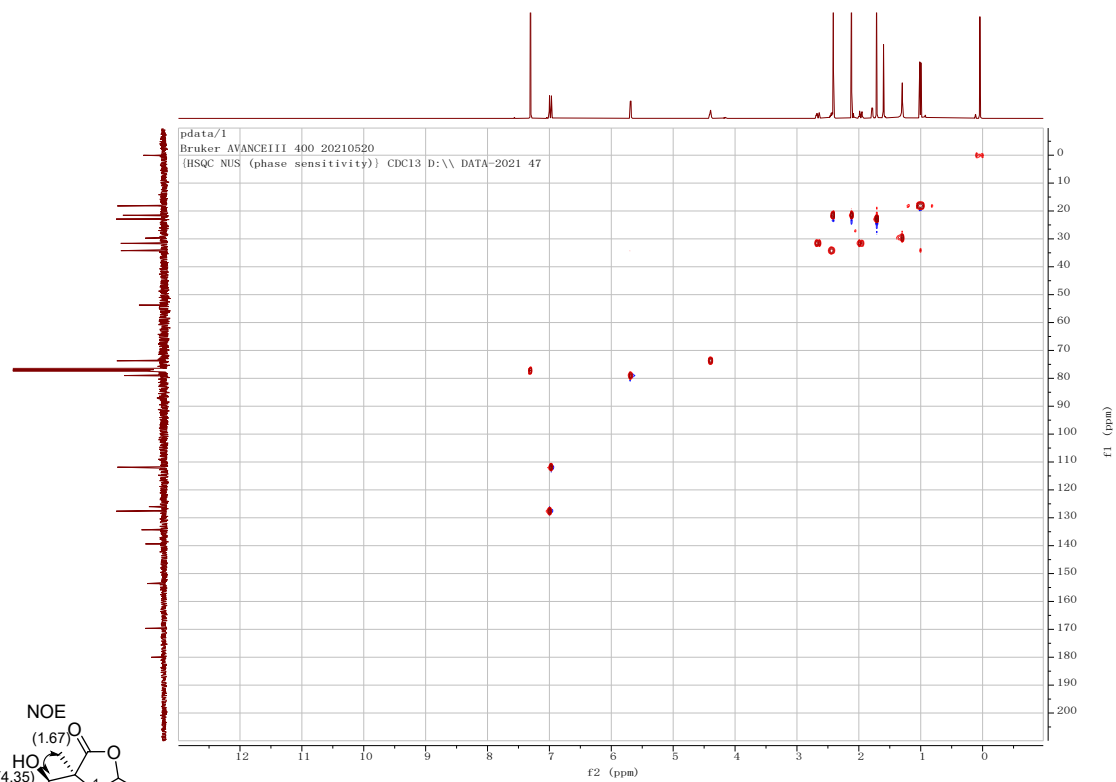

HSQC spectra of compound **1d**

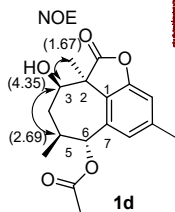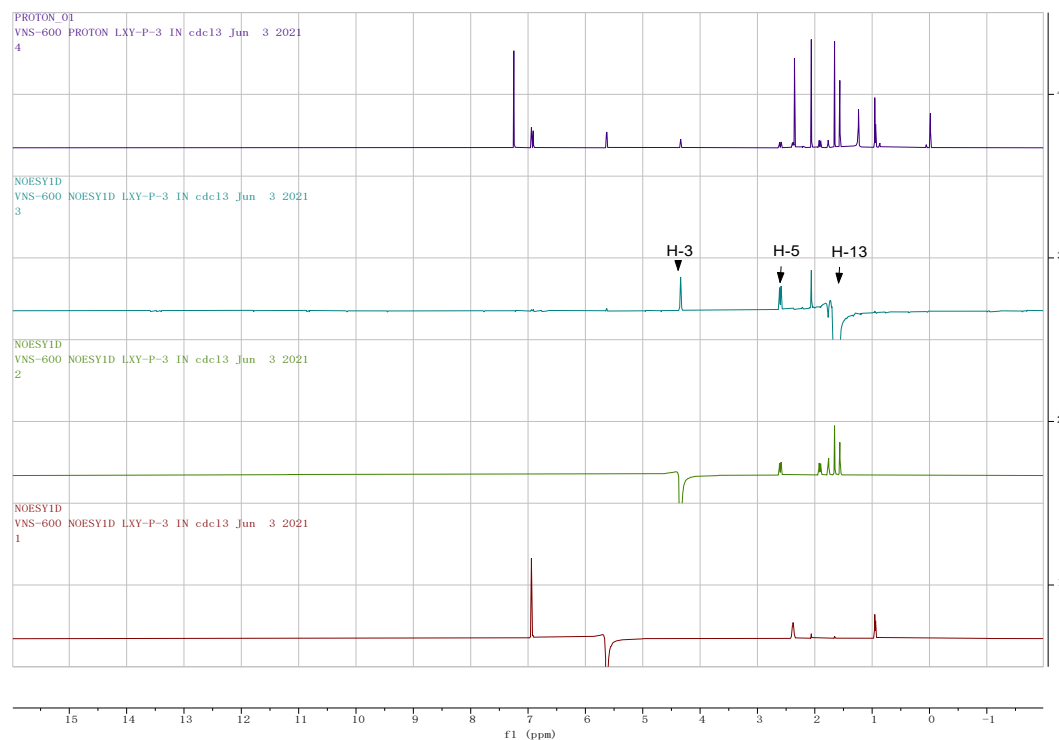

NOE spectra of compound **1d**

Table 1 The comparison of  $^1\text{H}$  and  $^{13}\text{C}$  NMR data of compound **1a** and reported natural commiphorane C

| position | natural commiphorane C                            |                            | <b>1a</b>                                         |                            |
|----------|---------------------------------------------------|----------------------------|---------------------------------------------------|----------------------------|
|          | $\delta_{\text{H}}$ (600M)                        | $\delta_{\text{C}}$ (150M) | $\delta_{\text{H}}$ (400M)                        | $\delta_{\text{C}}$ (100M) |
| 1        |                                                   | 121.2                      |                                                   | 121.0                      |
| 2        |                                                   | 53.2                       |                                                   | 53.1                       |
| 3        | 4.24 (t-like, 4.8)                                | 71.1                       | 4.24 (t, 5.1)                                     | 70.9                       |
| 4        | a 2.20 (dd, 1.4, 13.1),<br>b 2.10 (dd, 4.8, 13.1) | 39.8                       | a 2.19 (dd, 1.6, 12.0),<br>b 2.09 (dd, 4.8, 12.6) | 39.6                       |
| 5        | 2.18 (m)                                          | 32.3                       | 2.18 (m)                                          | 32.1                       |
| 6        | 5.91 (d, 10.0)                                    | 74.7                       | 5.91 (d, 9.7)                                     | 74.5                       |
| 7        |                                                   | 138.6                      |                                                   | 138.4                      |
| 8        | 6.81 (s)                                          | 119.1                      | 6.81 (s)                                          | 119.0                      |
| 9        |                                                   | 140.0                      |                                                   | 139.8                      |
| 10       | 6.86 (s)                                          | 110.5                      | 6.86 (s)                                          | 110.4                      |
| 11       |                                                   | 153.5                      |                                                   | 153.4                      |
| 12       |                                                   | 179.7                      |                                                   | 179.5                      |
| 13       | 1.53 (s)                                          | 19.6                       | 1.53 (s)                                          | 19.5                       |
| 14       | 1.03 (d, 6.4)                                     | 19.6                       | 1.03 (d, 6.2)                                     | 19.4                       |
| 15       | 2.38 (s)                                          | 22.3                       | 2.38 (s)                                          | 22.1                       |
| -OAc     |                                                   | 170.1                      |                                                   | 170.0                      |
| -OAc     | 2.29 (s)                                          | 21.0                       | 2.29 (s)                                          | 20.8                       |
| -OH      |                                                   |                            |                                                   |                            |

Table 2: the comparison of  $^1\text{H}$  and  $^{13}\text{C}$  NMR data of compound **1b** and reported natural commiphorane D

| position | natural commiphorane D     |                            | <b>1b</b>                  |                            |
|----------|----------------------------|----------------------------|----------------------------|----------------------------|
|          | $\delta_{\text{H}}$ (600M) | $\delta_{\text{C}}$ (150M) | $\delta_{\text{H}}$ (400M) | $\delta_{\text{C}}$ (100M) |
| 1        |                            | 122.2                      |                            | 122.2                      |
| 2        |                            | 49.9                       |                            | 49.9                       |
| 3        | 3.79 (t, 7.4)              | 69.9                       | 3.73-3.85 (m)              | 69.9                       |
| 4        | 2.08 (dd, 7.4, 9.9, 2H)    | 40.2                       | 2.03-2.14 (m)              | 40.3                       |
| 5        | 1.87 (m)                   | 37.7                       | 1.79-1.97 (m)              | 37.7                       |
| 6        | 5.82 (d, 10.5)             | 74.5                       | 5.82 (d, 10.4)             | 74.5                       |
| 7        |                            | 139.0                      |                            | 139.0                      |
| 8        | 6.81 (s)                   | 119.5                      | 6.81 (s)                   | 119.5                      |
| 9        |                            | 140.1                      |                            | 140.2                      |
| 10       | 6.88 (s)                   | 110.6                      | 6.88 (s)                   | 110.6                      |
| 11       |                            | 152.8                      |                            | 152.8                      |
| 12       |                            | 181.5                      |                            | 181.5                      |
| 13       | 1.58 (s)                   | 14.6                       | 1.58 (s)                   | 14.6                       |
| 14       | 1.06 (d, 6.7)              | 19.8                       | 1.06 (d, 6.7)              | 19.8                       |
| 15       | 2.38 (s)                   | 22.2                       | 2.37 (s)                   | 22.2                       |
| -OAc     |                            | 170.1                      |                            | 170.1                      |
| -OAc     | 2.28 (s)                   | 21.0                       | 2.28 (s)                   | 21.0                       |
| -OH      | 3.51(s)                    |                            | 3.51(s)                    |                            |

**Compounds 1a-1d and (±) 11 inhibited the fibrogenic action of TGF- $\beta$ 1 in rat renal proximal tubular cells.**

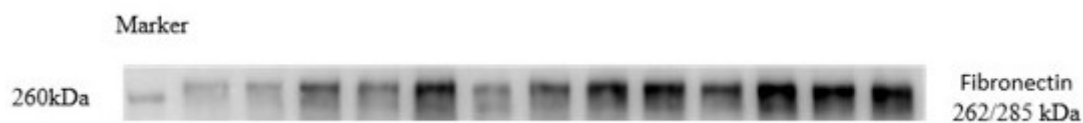

Cell lysates were immunoblotted with antibodies against fibronectin as indicated. After marker, the compounds were **1b**, **1c**, **1d**, **1a** and (±) **11** (25  $\mu$ M), and **1b**, **1c**, **1d**, **1a** and (±) **11** (50  $\mu$ M), DMSO with TGF- $\beta$ , DMSO without TGF- $\beta$ , GW: GW788388 in turn.

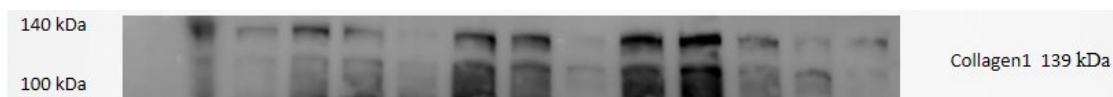

Cell lysates were immunoblotted with antibodies against collagen I as indicated. After marker, the compounds were **1b**, **1c**, **1d**, **1a** and (±) **11** (25  $\mu$ M), and **1b**, **1c**, **1d**, **1a** and (±) **11** (50  $\mu$ M), DMSO with TGF- $\beta$ , DMSO without TGF- $\beta$ , GW: GW788388 in turn.

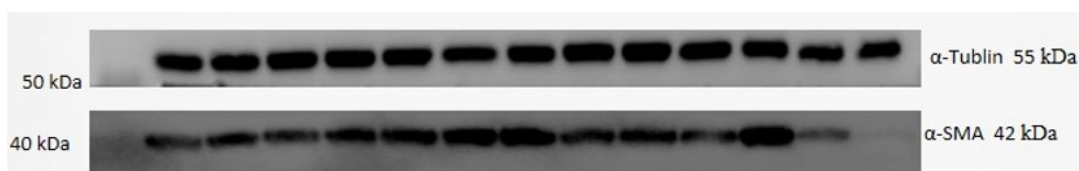

Cell lysates were immunoblotted with antibodies against  $\alpha$ -SMA, and  $\alpha$ -tubulin as indicated. After marker, the compounds were **1b**, **1c**, **1d**, **1a** and (±) **11** (25  $\mu$ M), and **1b**, **1c**, **1d**, **1a** and (±) **11** (50  $\mu$ M), DMSO with TGF- $\beta$ , DMSO without TGF- $\beta$ , GW: GW788388 in turn.
